# Supplementary material for: Memory B Cell Antibodies to HIV-1 gp140 Cloned from Individuals Infected with Clade A and B Viruses
Source: PubMed Central journal article supplement (PMC3169578; doi:10.1371/journal.pone.0024078), 2011-09-08
Supplement: pone.0024078.s001.pdf [file pone.0024078.s001.pdf]

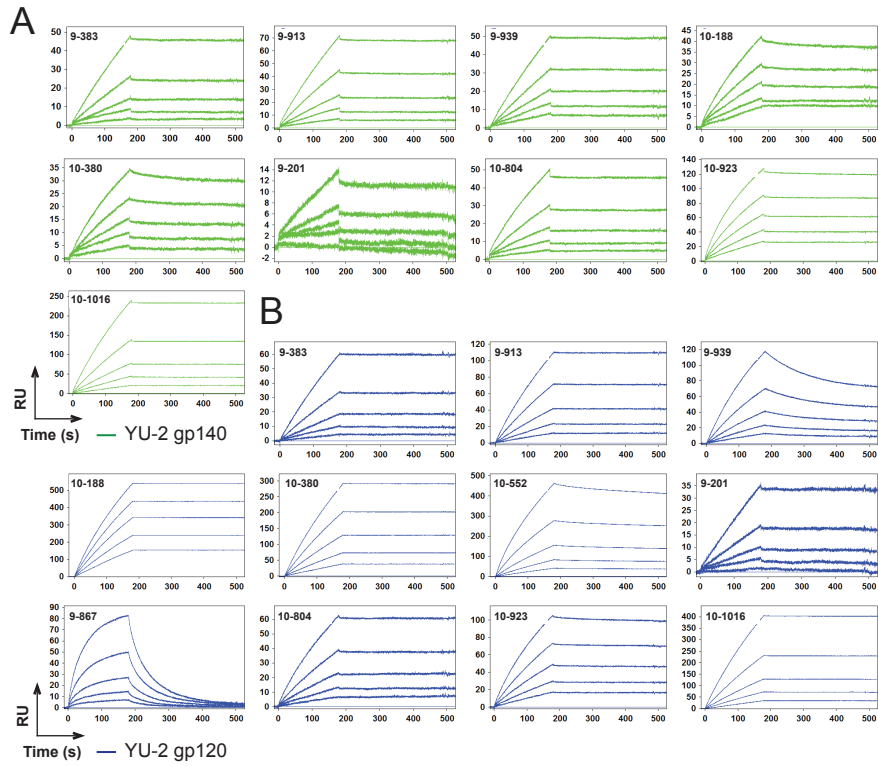

**C**

|                | gp120                       |                       |                       | gp140                       |                       |                       |
|----------------|-----------------------------|-----------------------|-----------------------|-----------------------------|-----------------------|-----------------------|
|                | $k_{a1}$ ( $M^{-1}s^{-1}$ ) | $k_{d1}$ ( $s^{-1}$ ) | $K_{A1}$ ( $M^{-1}$ ) | $k_{a1}$ ( $M^{-1}s^{-1}$ ) | $k_{d1}$ ( $s^{-1}$ ) | $K_{A1}$ ( $M^{-1}$ ) |
| <b>9-201</b>   | 9.4E+03                     | 3.6E-05               | <b>2.6E+08</b>        | 7.2E+03                     | 1.5E-04               | <b>4.9E+07</b>        |
| <b>9-383</b>   | 3.5E+04                     | 2.1E-05               | <b>1.7E+09</b>        | 2.0E+04                     | 7.0E-05               | <b>2.9E+08</b>        |
| <b>9-867</b>   | 6.3E+05                     | 4.3E-02               | <b>1.5E+07</b>        | -                           | -                     | -                     |
| <b>9-913</b>   | 5.4E+04                     | 3.7E-05               | <b>1.5E+09</b>        | 3.9E+04                     | 4.8E-04               | <b>8.1E+07</b>        |
| <b>9-939</b>   | 1.4E+05                     | 5.9E-03               | <b>2.3E+07</b>        | 3.5E+05                     | 1.1E-05               | <b>3.1E+10</b>        |
| <b>10-188*</b> | 8.8E+05                     | 9.4E-06               | <b>9.4E+10</b>        | 2.8E+06                     | 1.3E-03               | <b>2.2E+09</b>        |
| <b>10-380*</b> | 1.0E+05                     | 1.7E-06               | <b>6.0E+10</b>        | 5.7E+05                     | 2.1E-03               | <b>2.7E+08</b>        |
| <b>10-552</b>  | 5.2E+04                     | 4.6E-04               | <b>1.1E+08</b>        | -                           | -                     | -                     |
| <b>10-804</b>  | 6.6E+04                     | 1.4E-06               | <b>4.8E+10</b>        | 5.7E+04                     | 5.0E-05               | <b>1.1E+09</b>        |
| <b>10-923</b>  | 4.0E+06                     | 1.7E-03               | <b>2.4E+09</b>        | 4.8E+05                     | 6.5E-06               | <b>7.5E+10</b>        |
| <b>10-1016</b> | 4.9E+05                     | 6.3E-06               | <b>7.7E+10</b>        | 3.5E+05                     | 4.8E-07               | <b>7.3E+11</b>        |
