# Supplementary material for: Memory B Cell Antibodies to HIV-1 gp140 Cloned from Individuals Infected with Clade A and B Viruses
Source: PubMed Central journal article supplement (PMC3169578; doi:10.1371/journal.pone.0024078), 2011-09-08

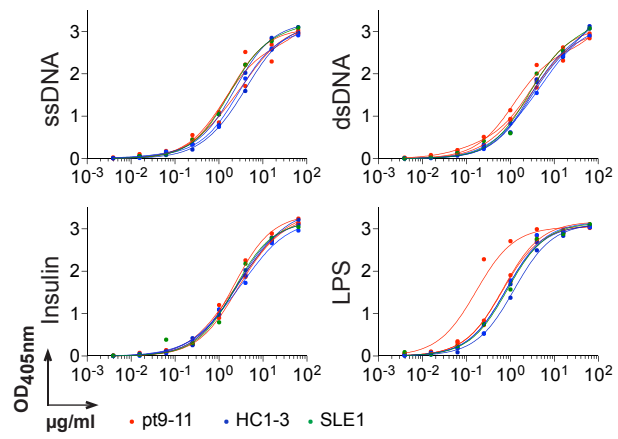

Supplement: pone.0024078.s003.pdf [file pone.0024078.s003.pdf]
