# Supplementary material for: Memory B Cell Antibodies to HIV-1 gp140 Cloned from Individuals Infected with Clade A and B Viruses
Source: PubMed Central journal article supplement (PMC3169578; doi:10.1371/journal.pone.0024078), 2011-09-08
Supplement: pone.0024078.s004.pdf [file pone.0024078.s004.pdf]

|             |   |          | pt9    | pt10 | pt11 |       |
|-------------|---|----------|--------|------|------|-------|
| 1           | A | DJ263.8  | 20.6   | 29   | 33.3 |       |
|             |   | SF162.LS | 21.9   | 3.7  | 1.8  |       |
|             | B | SS1196.1 | >500   | 9.5  | 73.1 |       |
|             |   | BaL.26   | 95.7   | 16.4 | 5.1  |       |
|             |   | MW965.26 | 0.4    | 0.8  | 2.3  |       |
|             | 2 | B        | 6535.3 | >500 | 7.3  | 9.2   |
| RHPA4259.7  |   |          | >500   | 18.6 | 15.6 | <1    |
| SC422661.8  |   |          | >500   | 52.1 | 55.6 | 1-5   |
| TRO.11      |   |          | >500   | 14.2 | 23.5 | 5-10  |
| PVO.4       |   |          | >500   | 89.9 | ND   | 10-25 |
| CAAN5342.A2 |   |          | ND     | ND   | 17.1 | >25   |
| YU2.DG      |   |          | 554    | 61   | 32   |       |
|             |   |          |        |      |      |       |
