# Supplementary material for: Memory B Cell Antibodies to HIV-1 gp140 Cloned from Individuals Infected with Clade A and B Viruses
Source: PubMed Central journal article supplement (PMC3169578; doi:10.1371/journal.pone.0024078), 2011-09-08
Supplement: pone.0024078.s005.pdf [file pone.0024078.s005.pdf]

## pt9

| mAb name | Heavy chain |      |        |           |                     | Light chain |       |     |      |      |      |              |         |        |        |          |       |       |   |
|----------|-------------|------|--------|-----------|---------------------|-------------|-------|-----|------|------|------|--------------|---------|--------|--------|----------|-------|-------|---|
|          | VH          | DH   | JH (-) | CDR3 (aa) | (+)                 | Length      | VHmut | κ/λ | Vκ/λ | Jκ/λ | CDR3 | Length       | Vκ/λmut | # exp. | # rel. | Epitopes | Neut. | Poly. |   |
| 9-201    | 3-7         | 3-9  | 3      | 2         | RYRTYYDILTGNAQSHD   | 3           | 17    | 25  | k    | 3-15 | 2    | QQYNSWPLCT   | 11      | 14     | 2      | 1        | CD4i  | X     | X |
| 9-383    | 4-61        | 3-3  | 4      | 1         | SGYFWSGDMYYFAH      | 1           | 14    | 36  | k    | 3-20 | 2    | QQHDRSPMPMYT | 12      | 20     | 2      | 2        | CD4bs | X     | X |
| 9-867    | 4-59        | 2-2  | 4      | 2         | LSVTEIPAAVFLDS      | 0           | 14    | 36  | k    | 3-15 | 1    | QQYHDWPWT    | 9       | 21     | 2      | 1        | CD4i  | X     | / |
| 9-905    | 4-59        | 3-9  | 6      | 2         | VALPYHDLITGPKYFYMDV | 2           | 20    | 28  | k    | 3-20 | 3    | QQYGDFFPT    | 9       | 9      | 2      | 2        | CD4i  | /     | X |
| 9-913    | 1-69        | 6-19 | 1      | 3         | LSRPPDRWLGTQRAEYLDQ | 3           | 19    | 37  | k    | 1-39 | 5    | QQTYNTRPMT   | 10      | 17     | 2      | 2        | CD4bs | X     | X |
| 9-939    | 1-2         | 3-10 | 5      | 2         | DSRMFDS             | 1           | 7     | 30  | l    | 7-43 | 3    | LLYSGGAWV    | 9       | 25     | 2      | 2        | CD4i  | X     | X |

## pt10

| mAb name | Heavy chain |             |        |           |                         | Light chain |       |     |      |      |      |             |         |        |        |          |                       |       |   |
|----------|-------------|-------------|--------|-----------|-------------------------|-------------|-------|-----|------|------|------|-------------|---------|--------|--------|----------|-----------------------|-------|---|
|          | VH          | DH          | JH (-) | CDR3 (aa) | (+)                     | Length      | VHmut | κ/λ | Vκ/λ | Jκ/λ | CDR3 | Length      | Vκ/λmut | # exp. | # rel. | Epitopes | Neut.                 | Poly. |   |
| 10-134   | 4-39        | 2-21        | 5      | 4         | HWVFDGDCGDCFTWLDP       | 1           | 16    | 57  | k    | 4-1  | 2    | QQFYTPYT    | 9       | 35     | 9      | 4        | gp120                 | X     | / |
| 10-137   | 1-2         | 3-16        | 4      | 4         | SDYDEWEYRYLAY           | 1           | 14    | 32  | k    | 2-28 | 1    | MQGLQTPWT   | 9       | 18     | 6      | 5        | gp41                  | /     | / |
| 10-147   | 3-23        | 2-16/19-24  | 4      | 1         | YGHSPYNNYRLFPD          | 3           | 15    | 41  | k    | 1-3  | 3    | QQLELYPHT   | 9       | 21     | 2      | 2        | gp41                  | ND    | X |
| 10-188*  | 3-49        | 3-16        | 6      | 5         | YGDYIWAPPEDHDYYGMDV     | 0           | 19    | 36  | l    | 1-44 | 3    | AAWDDSLNGPV | 11      | 28     | 5      | 5        | V3                    | X     | / |
| 10-380*  | 3-49        | 3-16        | 6      | 5         | YGDYIWSPPPEEYDYGVDV     | 0           | 21    | 36  | l    | 1-44 | 3    | ATWDAASLNRP | 11      | 30     |        |          | V3                    | X     | / |
| 10-325   | 3-48        | 4-4/6-19    | 6      | 3         | GPDFYSGRPTQGRTYDYFMDL   | 2           | 22    | 41  | k    | 1-12 | 4    | QQTNSFPLT   | 9       | 39     | 2      | 1        | gp41                  | /     | X |
| 10-346   | 1-69        | 4-4/11      | 6      | 3         | GDGSSSPFDYIYMDV         | 0           | 16    | 41  | k    | 3-15 | 4    | QQYNNWILT   | 9       | 9      | 2      | 2        | VL                    | X     | X |
| 10-390   | 1-69        | 3-3         | 6      | 2         | DGRQIFGASNRSGMDV        | 2           | 16    | 55  | k    | 3-20 | 1    | QQYASSPWA   | 9       | 24     | 5      | 4        | gp120 <sup>core</sup> | X     | X |
| 10-415   | 1-18        | 5-24/3-9/10 | 6      | 3         | DGEWQIMNYYKGMVDV        | 1           | 16    | 20  | k    | 3-20 | 1    | QQYGHSPRT   | 9       | 12     | 2      | 1        | CD4bs/DMR             | X     | X |
| 10-437   | 1-69        | 3-3/9       | 1      | 3         | DVLTNGWDHEYYQQ          | 1           | 14    | 57  | l    | 2-23 | 3    | CSYVRRI     | 7       | 32     | 3      | 2        | gp41                  | X     | X |
| 10-552   | 3-43        | 2-21        | 6      | 4         | DECNDCYSPHYYYMDV        | 1           | 18    | 32  | k    | 3-11 | 4    | QQRHKWPVT   | 9       | 18     | 3      | 3        | VL                    | X     | / |
| 10-596   | 3-23        | 3-16        | 4      | 1         | GPLGRFLDF               | 0           | 9     | 40  | l    | 2-8  | 1    | SSVAGSNTFYV | 11      | 27     | 5      | 2        | CD4i                  | /     | / |
| 10-647   | 1-2         | 3-3         | 4      | 0         | NVWIPARPLPRHFVA         | 3           | 16    | 44  | l    | 2-23 | 3    | LSVAGDNTWV  | 10      | 35     | 7      | 3        | gp41                  | /     | X |
| 10-679   | 1-2         | 3-3/9       | 5      | 1         | ILVIGARPLPRHFDP         | 3           | 16    | 46  | l    | 2-23 | 3    | CSVYGGDITWV | 10      | 37     | 2      | 1        | gp41                  | /     | X |
| 10-743   | 3-43        | 3-3         | 6      | 3         | DGASTGKYDFWGGTSRRGKYMDV | 4           | 25    | 38  | k    | 3-20 | 4    | QQYGTSPLT   | 9       | 20     | 1      | single   | CD4bs/DMR             | X     | / |
| 10-804   | 1-2         | 3-22        | 4      | 2         | VSYVDNSGSD              | 0           | 10    | 36  | k    | 3-20 | 3    | QHYGSSLLT   | 9       | 16     | 13     | 5        | CD4i                  | /     | X |
| 10-917   | 4-59        | 3-3         | 4      | 1         | GFIFGGVFFDY             | 0           | 11    | 19  | k    | 1-39 | 2    | QQSFRTPYT   | 9       | 23     | 1      | single   | VL                    | /     | X |
| 10-923   | 1-69        | 2-21/4-17   | 6      | 3         | EVGRDSKHFLGMDV          | 3           | 14    | 51  | k    | 3-15 | 1    | QQYNNRPPWT  | 10      | 25     | 3      | 3        | VL                    | /     | / |
| 10-1016  | 7-4         | 6-25        | 4      | 0         | SSLYG                   | 0           | 5     | 29  | k    | 2-24 | 1    | MAVTQNPWRWT | 11      | 28     | 3      | 1        | VL                    | /     | / |
| 10-1237  | 1-69        | 3-3         | 5      | 2         | SRTTIFVAQDNWFDV         | 1           | 16    | 39  | k    | 1-39 | 4    | QQSYSTPLT   | 9       | 19     | 4      | 2        | CD4bs                 | X     | / |
| 10-1255  | 4-34        | 2-8         | 4      | 2         | EAGSCSGGFCSSVEV         | 0           | 15    | 58  | k    | 3-20 | 1    | QQYASSPRM   | 9       | 31     | 2      | 1        | gp41-ID               | /     | / |
| 10-1304  | 4-31        | 3-3         | 6      | 2         | GVVGATGYDFYMDV          | 0           | 15    | 31  | k    | 3-15 | 4    | QQYNNWPT    | 8       | 14     | 2      | 1        | gp41                  | /     | X |
| 10-1323  | 1-69        | 6-6         | 6      | 3         | GDGSSSPFDYIYMDV         | 0           | 16    | 40  | k    | 3-15 | 4    | QQYNNWILT   | 9       | 10     | 2      | 2        | VL                    | X     | X |
| 10-1331  | 1-2         | 6-6         | 4      | 3         | DPFVLVDDTTP             | 0           | 11    | 49  | k    | 3-11 | 4    | QHRNNWPRALT | 11      | 13     | 3      | 2        | VL                    | /     | X |

## pt11

| mAb name | Heavy chain |               |        |           |                         | Light chain |       |     |      |      |      |             |         |        |        |          |                       |       |   |
|----------|-------------|---------------|--------|-----------|-------------------------|-------------|-------|-----|------|------|------|-------------|---------|--------|--------|----------|-----------------------|-------|---|
|          | VH          | DH            | JH (-) | CDR3 (aa) | (+)                     | Length      | VHmut | κ/λ | Vκ/λ | Jκ/λ | CDR3 | Length      | Vκ/λmut | # exp. | # rel. | Epitopes | Neut.                 | Poly. |   |
| 11-304   | 3-11        | 3-3/3-9/3-16  | 4      | 2         | GGFGGNYVVRDHYFDL        | 2           | 16    | 40  | k    | 3-15 | 1    | QQYDKLPGT   | 9       | 26     | 5      | 2        | VL                    | /     | X |
| 11-377   | 4-34        | 3-9           | 4      | 2         | AYLRYSNFVPKSAECDH       | 3           | 17    | 22  | k    | 1-5  | 2    | QQYSSYPYS   | 9       | 22     | 2      | 1        | VL                    | /     | X |
| 11-390   | 4-59        | 3-3           | 5      | 2         | DLTPVAVWSHFVRNNEFD      | 2           | 19    | 34  | l    | 2-11 | 3    | CSYVDFDI    | 10      | 24     | 2      | 1        | gp120 <sup>core</sup> | /     | X |
| 11-416   | 1-69        | 2-2           | 4      | 3         | ALISDDCATTICYPFDS       | 0           | 18    | 24  | k    | 4-1  | 1    | QQYTTPTQ    | 9       | 6      | 1      | single   | CD4i                  | X     | X |
| 11-453   | 4-48        | 3-3           | 4      | 0         | GSRAWSPNSGPFHY          | 2           | 14    | 27  | l    | 3-21 | 1    | QWHTSAYV    | 9       | 18     | 1      | single   | gp120 <sup>core</sup> | X     | / |
| 11-517   | 4-34        | 3-22          | 3      | 6         | GSARTLHSDSDAEYDQEPFDV   | 2           | 22    | 39  | k    | 4-1  | 1    | QQYHTPPWT   | 9       | 22     | 1      | single   | VL                    | X     | / |
| 11-521   | 4-31        | 3-16          | 3      | 2         | TSMRESRWAVDV            | 2           | 13    | 25  | l    | 2-8  | 3    | SSYAGTKNLV  | 10      | 13     | 2      | 1        | VL                    | /     | X |
| 11-527   | 1-69        | 3-22          | 6      | 2         | RDRNAYRAYYYYGLDV        | 3           | 16    | 22  | k    | 3-20 | 4    | QQYGRSMT    | 8       | 4      | 3      | 2        | CD4bs                 | X     | / |
| 11-537   | 1-69        | 4-17          | 3      | 6         | ELAWVNAEGEYGDYLDAFDI    | 0           | 21    | 13  | k    | 1-5  | 1    | QQYNSFPPT   | 9       | 7      | 3      | 3        | VL                    | X     | / |
| 11-554   | 1-18        | 6-6/6-25/6-13 | 3      | 2         | PMVAARGGDAFVD           | 1           | 13    | 32  | k    | 3-20 | 5    | QQYSSPPLT   | 10      | 11     | 17     | 2        | VL                    | X     | X |
| 11-567   | 1-69        | 4-23/4-4      | 4      | 1         | ARGVMTGARNTYFDL         | 2           | 15    | 35  | k    | 1-5  | 5    | QQYESHFMT   | 9       | 19     | 3      | 3        | VL                    | X     | X |
| 11-591   | 1-69        | 7-27/5-24     | 3      | 3         | DKTLGQQMVRKTGDALDV      | 3           | 18    | 26  | k    | 1-5  | 2    | QQYSSSPDT   | 10      | 20     | 1      | single   | VL                    | X     | X |
| 11-768   | 1-24        | 3-16          | 4      | 2         | DRLGRRLGELTAGFDY        | 3           | 16    | 21  | k    | 3-11 | 4    | QQRSYWPPLT  | 11      | 8      | 4      | 3        | CD4i                  | X     | / |
| 11-788   | 1-69        | 3-3           | 4      | 3         | TDGLCWSPPDCRPFYD        | 1           | 16    | 46  | k    | 1-5  | 1    | QQYHNYVT    | 9       | 15     | 2      | 2        | gp41-ID               | X     | X |
| 11-827   | 1-69        | 3-3           | 4      | 3         | RQKYEDMATAQLFDY         | 2           | 15    | 47  | k    | 1-33 | 2    | QHYTNIPOMYT | 11      | 34     | 3      | 3        | gp41-ID               | /     | X |
| 11-860   | 4-61        | 3-10          | 4      | 2         | LGPFLLVGEFQYFDS         | 0           | 16    | 43  | k    | 1-9  | 5    | QQLNSYSIT   | 9       | 21     | 9      | 4        | gp41-ID               | /     | X |
| 11-945   | 1-18        | 3-9           | 6      | 2         | DVGRILGAPARIFGGFHSYGLDV | 2           | 24    | 22  | k    | 2-29 | 1    | MOSKQLPWT   | 9       | 15     | 3      | 2        | CD4bs                 | X     | X |
| 11-989   | 1-69        | 3-10          | 6      | 2         | RLTVRRGGIHERHYLMDV      | 5           | 18    | 32  | k    | 1-27 | 3    | QKYGSALFT   | 9       | 11     | 16     | 3        | CD4bs                 | X     | X |
| 11-1076  | 1-2         | 3-3           | 5      | 1         | VLGSLNWFDP              | 0           | 10    | 27  | l    | 8-31 | 3    | LLYVCPGISV  | 10      | 20     | 4      | 2        | VL                    | /     | X |
| 11-1084  | 3-53        | 1-26          | 4      | 2         | EKFRVGIKGGWFDH          | 3           | 15    | 27  | l    | 2-23 | 1    | GSYVGSSTYV  | 10      | 18     | 3      | 2        | gp41                  | /     | X |
| 11-1136  | 4-31        | 3-22          | 3      | 1         | IPRVTMIRNAFDT           | 2           | 13    | 36  | l    | 2-8  | 3    | CSVAATYFWV  | 11      | 20     | 4      | 2        | CD4i                  | /     | X |
| 11-1164  | 3-23        | 6-13/6-19     | 4      | 3         | DEGRSAGTPKRYLDH         | 4           | 15    | 30  | k    | 2-28 | 2    | MQSLQTSYT   | 9       | 7      | 1      | single   | gp41                  | /     | X |
