# Supplementary material for: Memory B Cell Antibodies to HIV-1 gp140 Cloned from Individuals Infected with Clade A and B Viruses
Source: PubMed Central journal article supplement (PMC3169578; doi:10.1371/journal.pone.0024078), 2011-09-08
Supplement: pone.0024078.s006.pdf [file pone.0024078.s006.pdf]

| Clade      | Tier | Strain      | 9-201 | 9-383 | 9-867 | 9-905 | 9-913 | 9-939 | 10-188* | 10-346 | 10-380* | 10-390 | 10-415 | 10-437 | 10-552 | 10-596 | 10-647 | 10-679 | 10-804 | 10-923 | 10-1016 | 10-1304 |     |
|------------|------|-------------|-------|-------|-------|-------|-------|-------|---------|--------|---------|--------|--------|--------|--------|--------|--------|--------|--------|--------|---------|---------|-----|
| A          | 2    | 92RW020     | >50   | >50   | >50   | >50   | >50   | >50   | >50     | >50    | >50     | >50    | >50    | >50    | >50    | >50    | >50    | >37    | >50    | >50    | >50     | >50     |     |
|            |      | 93UG077     | >50   | ND    | >50   | >50   | 23.09 | >50   | >50     | ND     | >50     | >50    | 24.65  | >50    | ND     | >50    | >50    | >37    | >50    | >50    | ND      | ND      |     |
|            |      | 94UG103     | >50   | >50   | >50   | >50   | >50   | >50   | >50     | >50    | >50     | >50    | >50    | >50    | >50    | >50    | >50    | >50    | >37    | >50    | >50     | >50     | >50 |
|            |      | MGRM-A-010  | >50   | ND    | >50   | >50   | >50   | >50   | >50     | >50    | ND      | >50    | >50    | >50    | >50    | >50    | >50    | >50    | >37    | >50    | >50     | ND      | ND  |
| B          | 1    | NL43        | 1.34  | 2.21  | >50   | >50   | 0.49  | >50   | 16.7    | >50    | >50     | 0.57   | 1.49   | >50    | >50    | >50    | >50    | >37    | >50    | >50    | >50     | >50     |     |
|            |      | 92BR020     | 20.5  | >50   | >50   | >50   | >50   | >50   | 1.79    | 48.38  | 1.25    | >50    | >50    | >50    | 7.38   | >50    | >50    | >50    | >50    | >50    | >50     | >50     | >50 |
|            |      | APV13       | >50   | ND    | >50   | >50   | >50   | >50   | >50     | >50    | ND      | >50    | >50    | >50    | >50    | ND     | >50    | >50    | >37    | >50    | >50     | ND      | ND  |
|            |      | APV17       | >50   | ND    | >50   | >50   | >50   | >50   | >50     | >50    | ND      | >50    | >50    | >50    | >50    | ND     | >50    | >50    | >37    | >50    | >50     | ND      | ND  |
|            |      | APV6        | >50   | ND    | >50   | >50   | >50   | >50   | >50     | 22.77  | ND      | 13.82  | >50    | >50    | >50    | ND     | >50    | >50    | >37    | >50    | >50     | ND      | ND  |
|            |      | JRFL        | >50   | >50   | >50   | >50   | >50   | >50   | >50     | >50    | >50     | >50    | >50    | >50    | >50    | >50    | >50    | >50    | >37    | >50    | >50     | >50     | >50 |
|            |      | JRCSF       | >50   | >50   | >50   | >50   | >50   | >50   | >50     | >50    | ND      | >50    | >50    | >50    | >50    | ND     | >50    | >50    | >37    | >50    | >50     | ND      | ND  |
| C          | 2    | 93IN905     | >50   | >50   | >50   | >50   | >50   | >50   | >50     | >50    | >50     | >50    | >50    | >50    | >50    | >50    | >50    | >37    | >50    | >50    | >50     | >50     |     |
|            |      | IAVI-C-18   | >50   | ND    | >50   | >50   | >50   | >50   | >50     | >50    | ND      | >50    | >50    | >50    | >50    | ND     | >50    | >50    | >37    | >50    | >50     | ND      | ND  |
|            |      | IAVI-C-22   | >50   | >50   | >50   | >50   | >50   | >50   | >50     | >50    | >50     | >50    | >50    | >50    | >50    | >50    | >50    | >50    | >37    | >50    | >50     | >50     | >50 |
|            |      | IAVI-C-3    | 16.4  | ND    | 48.1  | >50   | >50   | >50   | 48.11   | ND     | >50     | >50    | >50    | >50    | ND     | >50    | >50    | >50    | >37    | >50    | >50     | ND      | ND  |
|            |      | 92UG005     | >50   | >50   | >50   | >50   | >50   | >50   | >50     | >50    | >50     | >50    | >50    | >50    | >50    | >50    | >50    | >50    | >37    | >50    | >50     | >50     | >50 |
|            |      | 92UG024     | 28.48 | >50   | >50   | >50   | 44.42 | >50   | >50     | 44.87  | >50     | >50    | 47.77  | >50    | >50    | >50    | >50    | >50    | >37    | >50    | >50     | >50     | >50 |
|            |      | MGRM-D-001  | >50   | ND    | >50   | >50   | >50   | >50   | >50     | >50    | ND      | >50    | >50    | >50    | >50    | ND     | >50    | >50    | >37    | >50    | >50     | ND      | ND  |
| MGRM-D-018 | >50  | ND          | >50   | >50   | >50   | >50   | >50   | >50   | ND      | >50    | >50     | >50    | >50    | ND     | >50    | >50    | >37    | >50    | >50    | ND     | ND      |         |     |
| CRF01_AE   | 2    | 92TH021     | >50   | >50   | >50   | >50   | >50   | >50   | >50     | >50    | >50     | >50    | >50    | >50    | >50    | >50    | >50    | >37    | >50    | >50    | >50     | >50     |     |
| CMU02      |      | >50         | ND    | >50   | >50   | >50   | >50   | >50   | >50     | ND     | >50     | >50    | >50    | >50    | ND     | >50    | >50    | >37    | >50    | >50    | ND      | ND      |     |
| CRF_AG     | 2    | MGRM-AG-005 | >50   | >50   | >50   | >50   | >50   | >50   | >50     | >50    | >50     | >50    | >50    | >50    | >50    | >50    | >50    | >37    | >50    | >50    | >50     | >50     |     |
| Control    |      | aMLV        | >50   | >50   | >50   | >50   | >50   | >50   | >50     | >50    | >50     | >50    | >50    | >50    | >50    | >50    | >50    | >37    | >50    | >50    | >50     | >50     |     |

<1 1-5 5-10 10-25 >25 µg/ml
