# Supplementary material for: Memory B Cell Antibodies to HIV-1 gp140 Cloned from Individuals Infected with Clade A and B Viruses
Source: PubMed Central journal article supplement (PMC3169578; doi:10.1371/journal.pone.0024078), 2011-09-08
Supplement: pone.0024078.s007.pdf [file pone.0024078.s007.pdf]

| #  | Amino acid sequence  | #  | Amino acid sequence   |
|----|----------------------|----|-----------------------|
| 1  | SAAEQLWVTVYYGVPVWKEA | 48 | LAEEEIVIRSENFNTNAKTI  |
| 2  | LWVTVYYGVPVWKEATTLF  | 49 | IVIRSENFNTNAKTIIVQLN  |
| 3  | YVGVPVWKEATTLFCASDA  | 50 | ENFTNAKTIIVQLNESVVI   |
| 4  | VWKEATTLFCASDAKAYDT  | 51 | NAKTIIVQLNESVINCTRP   |
| 5  | TTTLFCASDAKAYDTEVHNV | 52 | IVQLNESVINCTRPNNNTR   |
| 6  | CASDAKAYDTEVHNVWATHA | 53 | ESVINCTRPNNNTRKSINI   |
| 7  | KAYDTEVHNVWATHACVPTD | 54 | NCTRPNNNTRKSINIGPGRA  |
| 8  | EVHNVWATHACVPTDPNPQE | 55 | NNNTRKSINIGPGRALYTT   |
| 9  | WATHACVPTDPNPQEVKLEN | 56 | RKSINIGPGRALYTTGEII   |
| 10 | CVPTDPNPQEVKLENTENF  | 57 | NIGPGRALYTTGEIIGDIRQ  |
| 11 | PNPQEVKLENTENFNMWKN  | 58 | RALYTTGEIIGDIRQAHCNL  |
| 12 | VKLENTENFNMWKNMVEQ   | 59 | TGEIIGDIRQAHCNLSKTQW  |
| 13 | VTENFNMWKNMVEQMHEDI  | 60 | GDIRQAHCNLSKTQWENTLE  |
| 14 | NMWKNMVEQMHEDIISLWD  | 61 | AHCNLSKTQWENTLEQIAIK  |
| 15 | NMVEQMHEDIISLWDQSLKP | 62 | SKTQWENTLEQIAIKKEQF   |
| 16 | MHEDIISLWDQSLKPCVKLT | 63 | ENTLEQIAIKKEQFGNNKT   |
| 17 | ISLWDQSLKPCVKLTPLCVT | 64 | EQIAIKKEQFGNNKTIIFN   |
| 18 | DQSLKPCVKLTPLCVTLNCT | 65 | KLKEQFGNNKTIIFNPSS    |
| 19 | PCVKLTPLCVTLNCTDLRNA | 66 | EQFGNNKTIIFNPSSGGDPE  |
| 20 | TPLCVTLNCTDLRNATNTS  | 67 | NKTIIFNPSSGGDPEIVTHS  |
| 21 | TLNCTDLRNATNTSSSWET  | 68 | FNPSSGGDPEIVTHSFNC    |
| 22 | DLRNATNTSSSWETMEKGE  | 69 | SSGGDPEIVTHSFNCGGEFF  |
| 23 | TNTSSSWETMEKGEIKNCS  | 70 | PEIVTHSFNCGGEFFYCNST  |
| 24 | SSWETMEKGEIKNCSFNITT | 71 | HSFNCGGEFFYCNSTQLFTW  |
| 25 | MEKGEIKNCSFNITTSIRDK | 72 | GGEFFYCNSTQLFTWINDTRK |
| 26 | IKNCSFNITTSIRDKVQKEY | 73 | YCNSTQLFTWINDTRKLNNT  |
| 27 | FNITTSIRDKVQKEYALFYN | 74 | TQLFTWINDTRKLNNTGRNIT |
| 28 | SIRDKVQKEYALFYNLDVVP | 75 | WINDTRKLNNTGRNITLPCRI |
| 29 | VQKEYALFYNLDVVPIDNAS | 76 | KLNNTGRNITLPCRKQIIN   |
| 30 | ALFYNLDVVPIDNASYRLIS | 77 | GRNITLPCRKQIINMWQEV   |
| 31 | LDVVPIDNASYRLISNTSV  | 78 | LPCRKQIINMWQEVGKAMY   |
| 32 | IDNASYRLISNTSVITQAC  | 79 | KQIINMWQEVGKAMYAPPIR  |
| 33 | YRLISNTSVITQACPKVSF  | 80 | MWQEVGKAMYAPPIRQIRC   |
| 34 | CNTSVITQACPKVSFEPIPI | 81 | GKAMYAPPIRQIRCSSNIT   |
| 35 | ITQACPKVSFEPIPIHYCAP | 82 | APPIRQIRCSSNITGLLLT   |
| 36 | PKVSFEPIPIHYCAPAGFAI | 83 | GQIRCSSNITGLLLTRDGGK  |
| 37 | EPIPIHYCAPAGFAILKCND | 84 | SSNITGLLLTRDGGKDTNGT  |
| 38 | HYCAPAGFAILKCNDKFFN  | 85 | GLLLTRDGGKDTNGTEIFRP  |
| 39 | PAGFAILKCNDKFFNGTGPC | 86 | RDGGKDTNGTEIFRPGGGDM  |
| 40 | ILKCNDKFFNGTGPCNVST  | 87 | DTNGTEIFRPGGGDMRDNR   |
| 41 | DKKFFNGTGPCNVSTVQCTH | 88 | EIFRPGGGDMRDNRSELYK   |
| 42 | GTGPCNVSTVQCTHGIRPV  | 89 | GGGDMRDNRSELYKYKVVK   |
| 43 | TNVSTVQCTHGIRPVVSTQL | 90 | RDNWRSELYKYKVVKIEPL   |
| 44 | VQCTHGIRPVVSTQLLLNGS | 91 | RSELYKYKVVKIEPLGVAPT  |
| 45 | GIRPVVSTQLLLNGSLAEEE | 92 | KYKVVKIEPLGVAPTAKARR  |
| 46 | VSTQLLLNGSLAEEEIVIRS | 93 | KIEPLGVAPTAKARRVQRE   |
| 47 | LLNGSLAEEEIVIRSENFNT | 94 | GVAPTAKARRVQREKR      |
